# Supplementary material for: Preventing pressure injury in nursing homes: developing a care bundle using the Behaviour Change Wheel
Source: PubMed Central journal article supplement (PMC6561451; doi:10.1136/bmjopen-2018-026639), 2019-06-03
Supplement: bmjopen-2018-026639supp001.pdf [file bmjopen-2018-026639supp001.pdf]

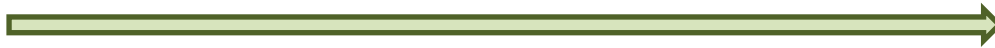

| <b>Stage 1: Understand the behaviour</b>   | <b>Stage 2: Identify intervention options</b> | <b>Stage 3: Identify content and implementation options</b> |
|--------------------------------------------|-----------------------------------------------|-------------------------------------------------------------|
| 1. Define the problem in behavioural terms | 5. Identify intervention functions            | 7. Identify behaviour change techniques                     |
| 2. Select target behaviour                 | 6. Identify policy categories                 | 8. Identify mode of delivery                                |
| 3. Specify the target behaviour            |                                               |                                                             |
| 4. Identify what needs to change           |                                               |                                                             |

I  
N  
T  
E  
R  
V  
E  
N  
T  
I  
O  
N
